# Supplementary material for: Identification and Characterization of MicroRNAs inMacaca fascicularisby EST Analysis
Source: Hindawi journal article supplement (doi:10.1155/2012/957607), 2012-01-01

### Supplementary Data:

Table. Percentage of human miRNAs represented in the *Macaca mulatta* miRNAs database, and vice versa.

| Species   | Number of homologs | Percent(Homologs/Total miRNAs) |
|-----------|--------------------|--------------------------------|
| mml-miRNA | 468                | 95.90%(468/488)                |
| hsa-miRNA | 589                | 30.66%(589/1921)               |

Phylogenetic analysis of mature miRNAs sequences in different families. (A) miR-

122(B) miR-122\*(C) miR-548aa (D) miR-548d (E) miR-675

(A) miR-122

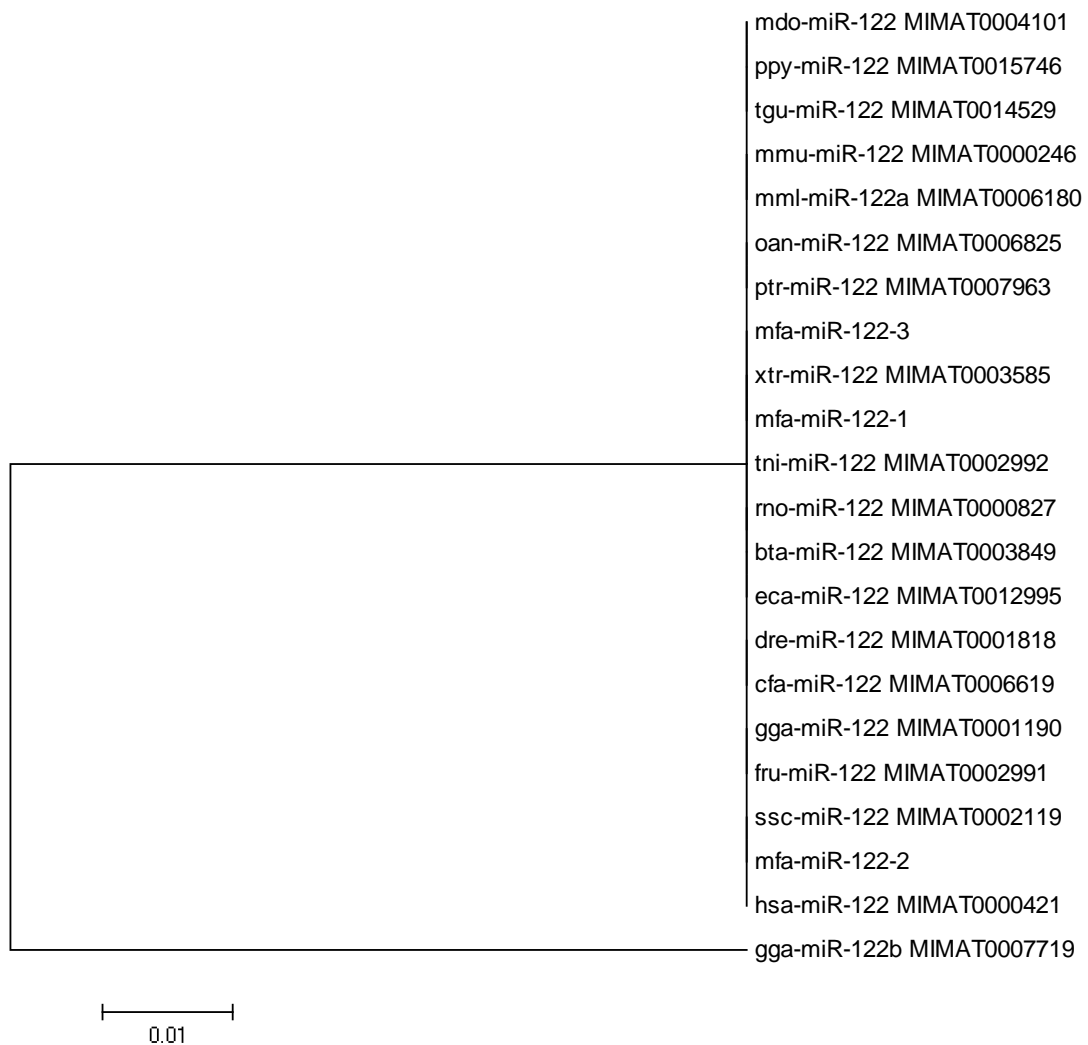

(B) miR-122\*

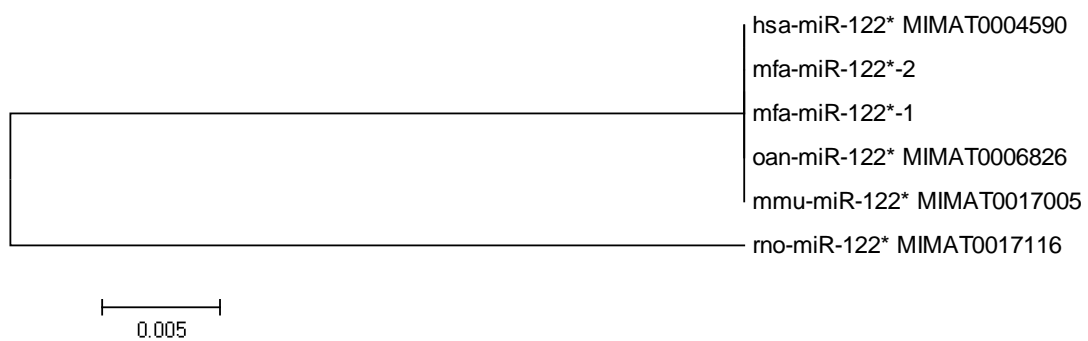

(C) miR-548aa

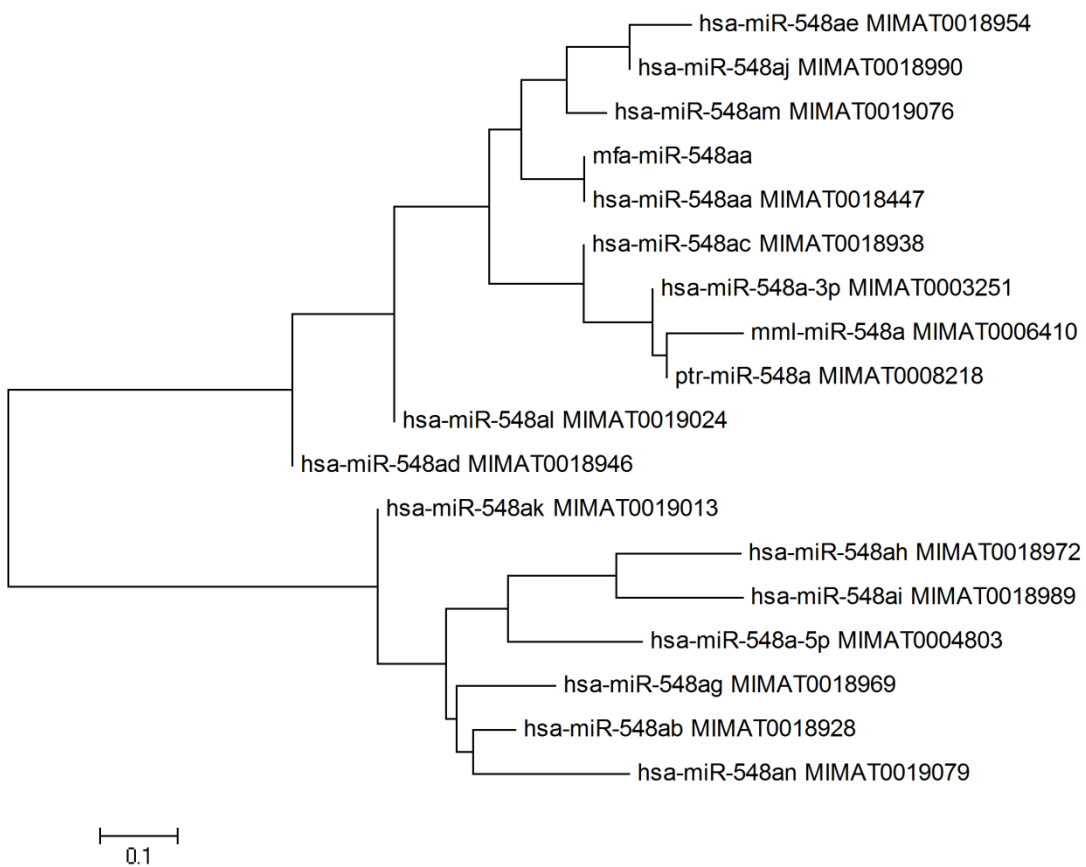

(D) miR-548d

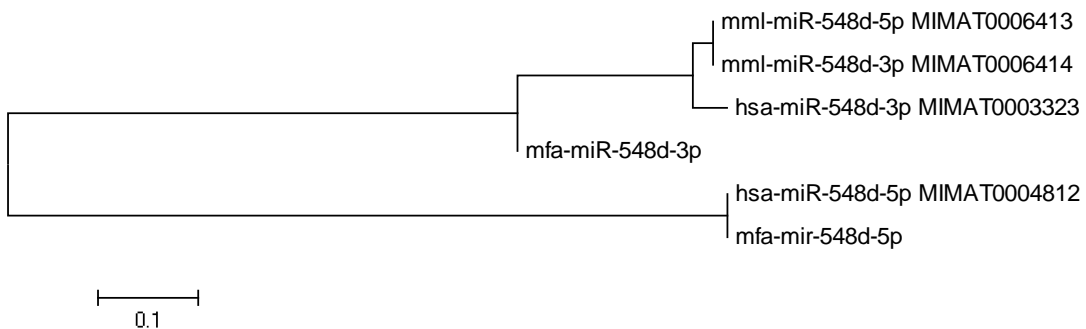

(E) miR-675

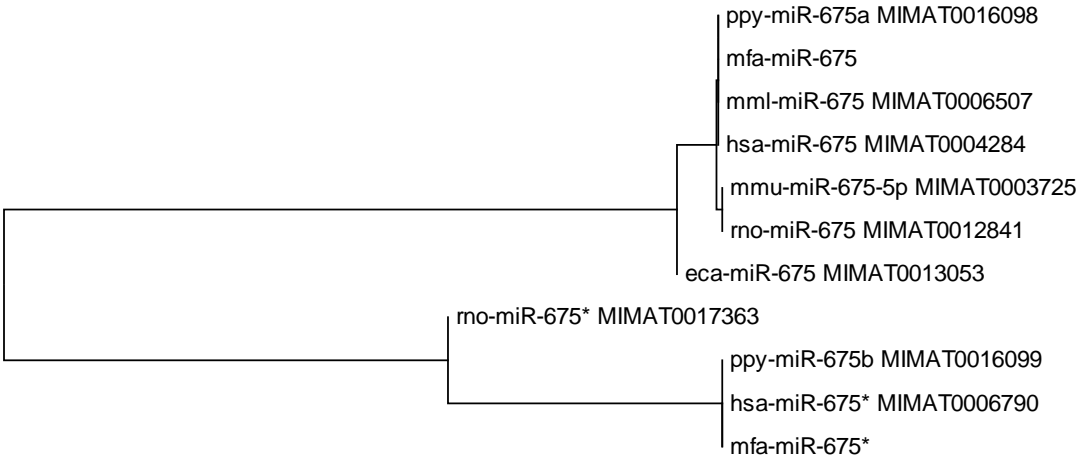

1

Phylogenetic analysis of precursor miRNAs sequences in different families. (A) pre-miR-122 family (B) pre-miR-548 family (C)pre-miR-675 family

(A) pre-miR-122 family

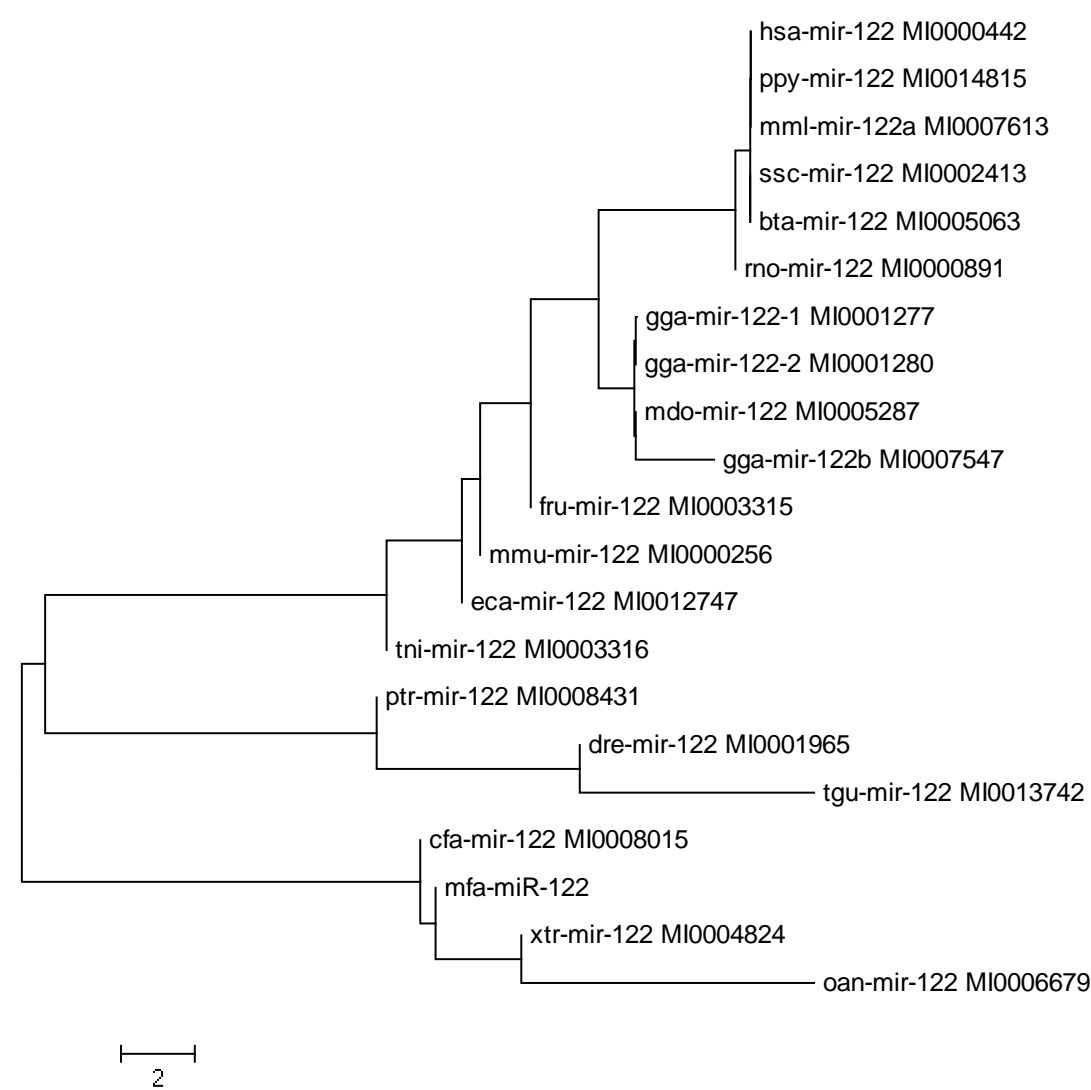

(B) pre-miR-548 family

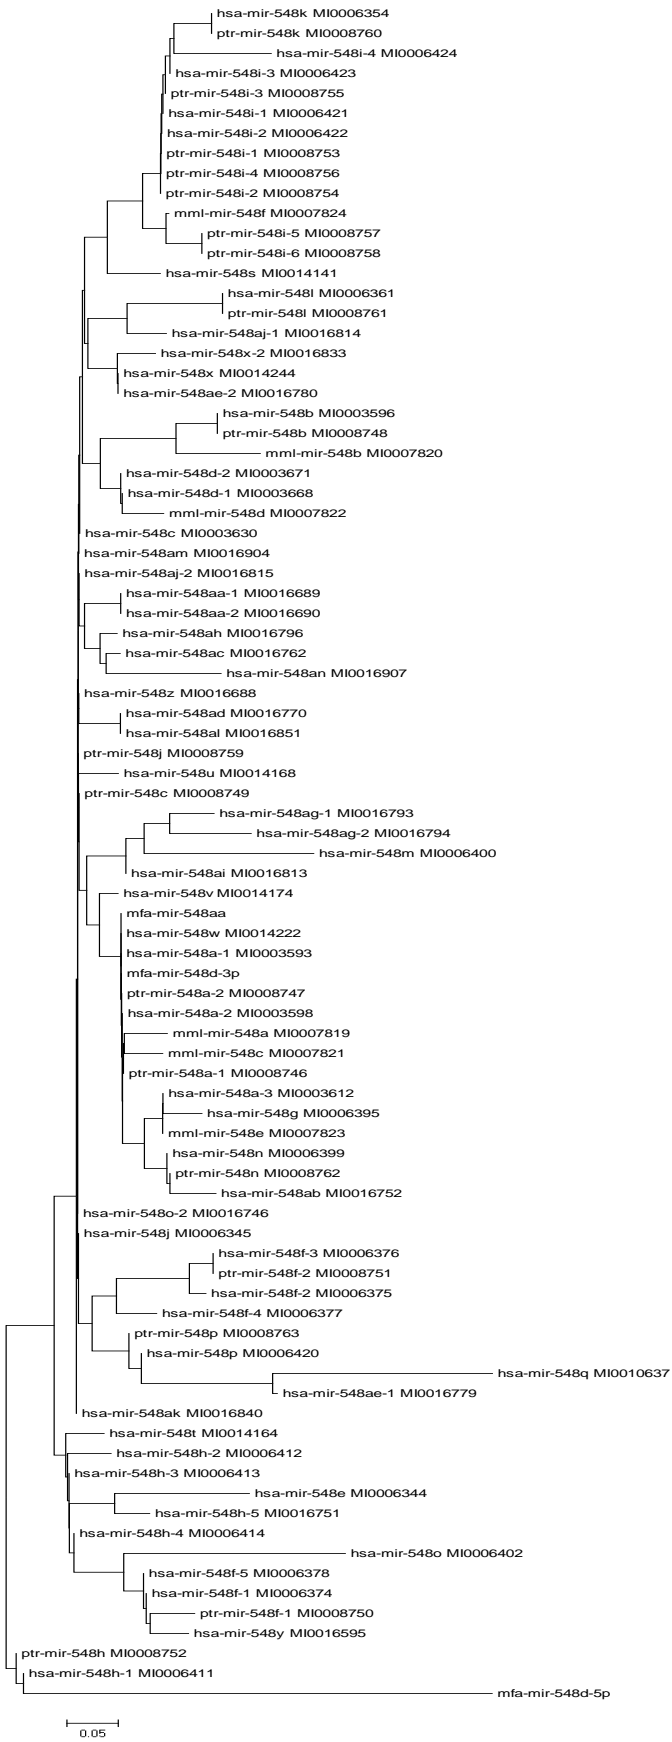

(C) pre-miR-675 family

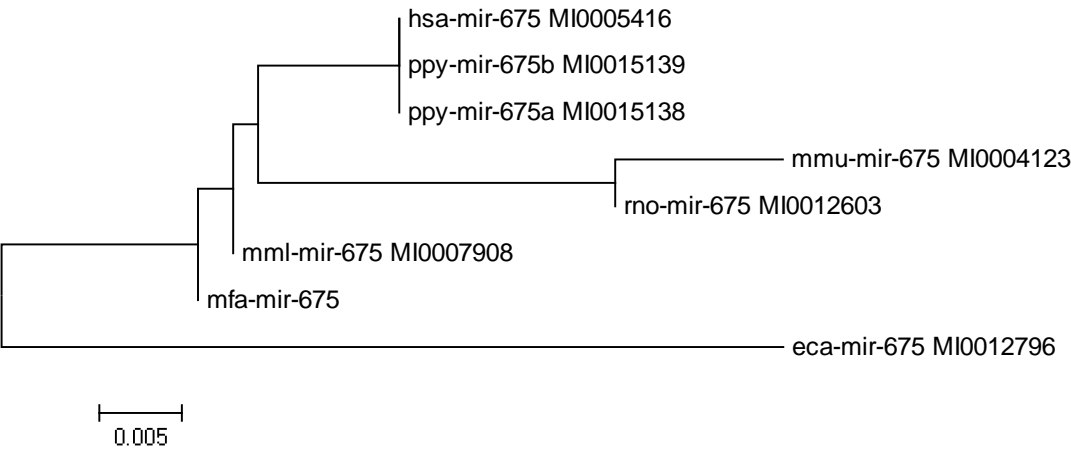

Supplement: f1 [file 957607.f1.pdf]
